# Supplementary material for: Disruption of both chloroplastic and cytosolic FBPase genes results in a dwarf phenotype and important starch and metabolite changes in Arabidopsis thaliana
Source: PubMed Central journal article supplement (PMC4986871; doi:10.1093/jxb/erv062), 2015-03-05
Supplement: supp_erv062_jexbot139378_file001.pdf [file supp_erv062_jexbot139378_file001.pdf]

**Disruption of both chloroplastic and cytosolic FBPases genes results in dwarf phenotype and important starch and metabolite changes in *Arabidopsis thaliana***

José A. Rojas-González<sup>1</sup>, Mauricio Soto-Suárez<sup>1\*</sup>, Ángel García-Díaz<sup>1\*\*</sup>, María C. Romero-Puertas<sup>1</sup>, Luisa M. Sandalio<sup>1</sup>, Ángel Mérida<sup>2</sup>, Ina Thormählen<sup>3</sup>, Peter Geigenberger<sup>3</sup>, Antonio J. Serrato<sup>1</sup> and Mariam Sahrawy<sup>1§</sup>

A

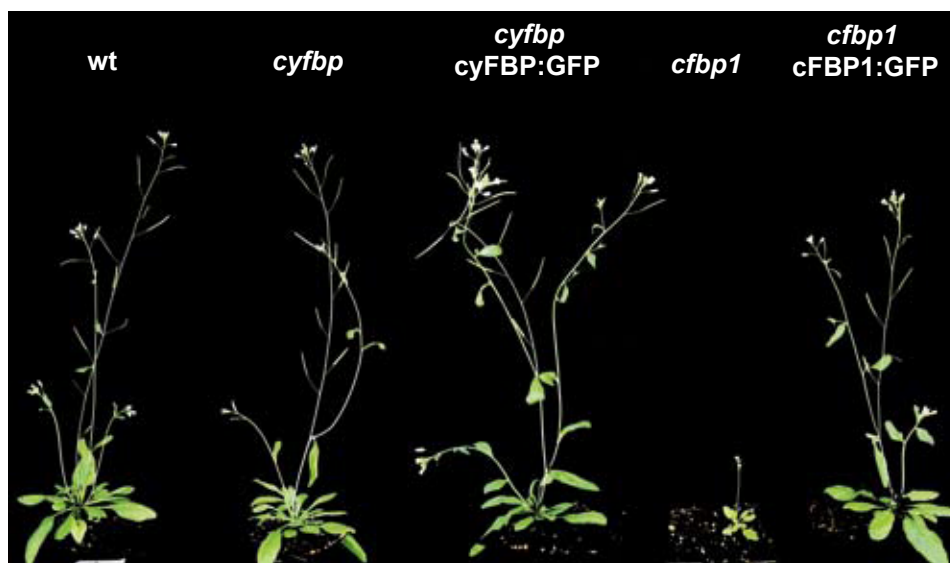

B

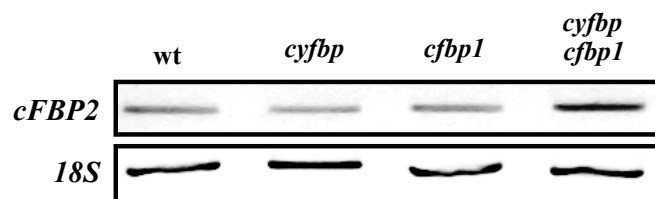

C

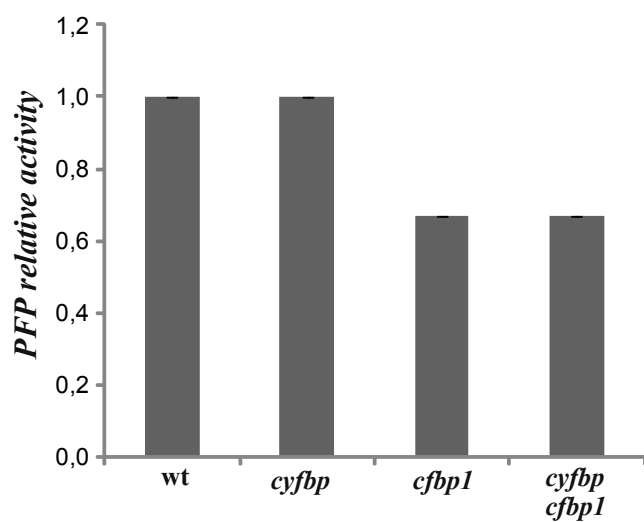

Supplementary Figure S2

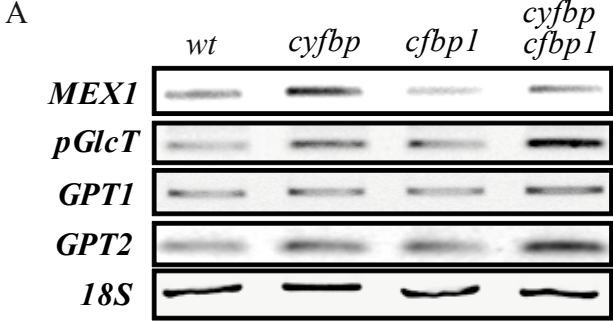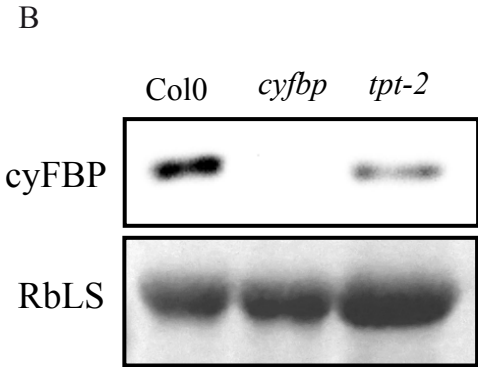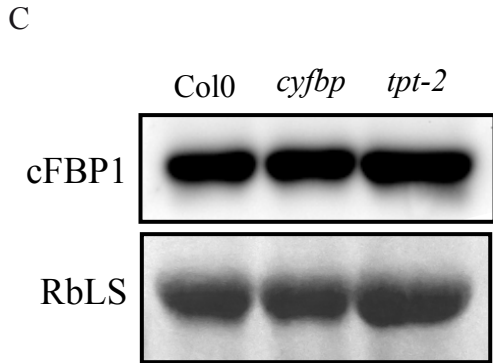

**Supplementary Table S1** Gene-specific oligonucleotides used for semi-quantitative PCR

| Oligos     | Gene Analyzed | Primer sequence           |
|------------|---------------|---------------------------|
| CYFBP F    | AT1G43670     | GAGAGACAGAGACAGTAAG       |
| CYFBP R    |               | ACCCGGCTGACAAGAAAAGCCCCAA |
| LBSALK     |               | TGGTTCACGTAGTGGGCCATCG    |
| CFBP F     | AT3G54050     | GATATCTCAGCTCTTGGGTC      |
| CFBP1 R    |               | GATGTATCTCAGTCGGTTGG      |
| GABI       |               | CCCATTTGGACGTGAATGTAGACAC |
| 18s RNA F  | Arabidopsis   | AATATACGCTATTGGAGCTGG     |
| 18s RNA R  |               | ATGGCTCATTAAATCAGTTAT     |
| FeSOD1 F   | AT4G25100     | TGCTCTTTTCTGAGTGTGTGTGCG  |
| FeSOD1 R   |               | TGAATAATGGGCCATGCCAAAC    |
| FeSOD3 F   | AT5G23310     | CATCAGTGAGCCCTGTATGGTGAC  |
| FeSOD3 R   |               | ATACTCTCAGTCACGTGCCGGGTC  |
| MnSOD1 F   | AT3G10920     | GAGATGAACCAGTTCAGCTCAG    |
| MnSOD1 R   |               | CAACGTACCACACAGCTGAGTTG   |
| CuZnSOD1 F | AT1G08830     | AACTCAGCCTGGCTACTGGAAAC   |
| CuZnSOD1 R |               | CACACA ACTACCAAACCCAGGTC  |
| CuZnSOD2 F | AT2G28190     | GAACAATGGTGAAGGCTGTG      |
| CuZnSOD2 R |               | GTGACCACCTTTCCCAAGAT      |
| CuZnSOD3 F | AT5G18100     | AGTATTCCATACTCGGGAGGGCG   |
| CuZnSOD3 R |               | GCATCCGCAGATGATTGAAGTCC   |
| GPT1 5     | AT4G24620     | AAGTTCTCGCCCTGCAAAGC      |
| GPT1 3     |               | CGTACAGGTCATCCACATTGC     |
| GPT2 5     | AT1G61800     | AGTGGCACAAAGTGTGTTTTACC   |
| GPT2 3     |               | TCCTCACTGCTTCGCCTGTGAGT   |
| pGlcT 5    | AT5G16450     | TTTCTCTCGGCATGCACTGG      |
| pGlcT 3    |               | CTATTTCTCCAGTGATCGACC     |
| MEX1 5     | AT5G1752      | TTGATGTGGCTCACTGGTTTCG    |
| MEX1 3     |               | GTTGTGACCATAAGCCACTGC     |

Supplementary Table S2. Stomatal density and stomatal index in epidermis of leaves of the wild-type and *cyfbp*, *cfbp1*, and *cyfbp cfbp1* mutants at the adaxial and abaxial surfaces.

|                    | Stomatal density |          | Stomatal index (%) |         |
|--------------------|------------------|----------|--------------------|---------|
|                    | Adaxial          | Abaxial  | Adaxial            | Abaxial |
| Wild-type          | 384±26           | 215±13   | 23±2               | 12±1    |
| <i>cyfbp</i>       | 228±20 *         | 315±36 * | 15±1 *             | 16±3    |
| <i>cfbp1</i>       | 296±30 *         | 349±67 * | 10±1 *             | 18±2 *  |
| <i>cyfbp cfbp1</i> | 274±44 *         | 442±41 * | 11±1 *             | 14±3    |

Stomatal density, number stomata/mm<sup>2</sup>; ± S.D. (n=8)

Stomatal index, SI = number of stomata/(number of epidermal cells + number of stomata) × 100

Data represents average ±SD for three different leaves per experiment. Asterisks (\*) indicate a significant differences between means (Student's t-test, P <0.005). (SD density of stomata=number of stomata per mm<sup>2</sup>) and stomata index determination (SI= number of stomata/ (number of epidermal cells + number of stomata) × 100)

**Supplementary Table S3.** Changes in Arabidopsis leaf metabolite levels at the end of the night in *cyfbp*, *cfbp1* and *cyfbp cfbp1* knockout lines relative to the wild type. Metabolite profiling was performed using GC-TOF-MS analysis and fluorescence spectroscopy. Results are means  $\pm$  SD ( $n = 6$ ). Values that are significantly different from the wild type according to Student's *t*-test are indicated in bold ( $P$  value  $\leq 0.05$ ).

| Metabolites                       | WT              | cyfbp                             | p-value      | Dark                              |                  | cyfbp x cfbp1                     | p-value          |  |
|-----------------------------------|-----------------|-----------------------------------|--------------|-----------------------------------|------------------|-----------------------------------|------------------|--|
|                                   |                 |                                   |              | cfbp1                             | p-value          |                                   |                  |  |
| <u>Sugars</u>                     |                 |                                   |              |                                   |                  |                                   |                  |  |
| Arabinose                         | 1,00 $\pm$ 0,20 | 0,89 $\pm$ 0,50                   | 0,623        | <b>0,56 <math>\pm</math> 0,19</b> | <b>0,003</b>     | 0,76 $\pm$ 0,20                   | 0,066            |  |
| Fructose                          | 1,00 $\pm$ 0,80 | 0,65 $\pm$ 0,78                   | 0,460        | <b>0,12 <math>\pm</math> 0,04</b> | <b>0,023</b>     | <b>0,15 <math>\pm</math> 0,05</b> | <b>0,026</b>     |  |
| Fucose                            | 1,00 $\pm$ 0,28 | 0,90 $\pm$ 0,50                   | 0,690        | <b>0,47 <math>\pm</math> 0,16</b> | <b>0,002</b>     | <b>0,53 <math>\pm</math> 0,12</b> | <b>0,007</b>     |  |
| Galactose                         | 1,00 $\pm$ 0,60 | 0,83 $\pm$ 0,63                   | 0,638        | 0,52 $\pm$ 0,15                   | 0,088            | 0,61 $\pm$ 0,18                   | 0,157            |  |
| Glucose                           | 1,00 $\pm$ 0,71 | 0,67 $\pm$ 0,57                   | 0,391        | <b>0,11 <math>\pm</math> 0,07</b> | <b>0,013</b>     | <b>0,07 <math>\pm</math> 0,02</b> | <b>0,010</b>     |  |
| Isomaltose                        | 1,00 $\pm$ 0,07 | 0,67 $\pm$ 0,72                   | 0,477        | n.d.                              |                  | n.d.                              |                  |  |
| Maltose                           | 1,00 $\pm$ 0,27 | 1,42 $\pm$ 0,83                   | 0,271        | <b>0,20 <math>\pm</math> 0,07</b> | <b>&lt;0,001</b> | <b>0,35 <math>\pm</math> 0,09</b> | <b>&lt;0,001</b> |  |
| Mannose                           | 1,00 $\pm$ 0,58 | 0,80 $\pm$ 0,58                   | 0,559        | <b>0,27 <math>\pm</math> 0,08</b> | <b>0,012</b>     | <b>0,33 <math>\pm</math> 0,10</b> | <b>0,019</b>     |  |
| Psicose                           | 1,00 $\pm$ 0,35 | 1,10 $\pm$ 0,67                   | 0,744        | <b>0,40 <math>\pm</math> 0,13</b> | <b>0,006</b>     | <b>0,53 <math>\pm</math> 0,16</b> | <b>0,013</b>     |  |
| Rhamnose                          | 1,00 $\pm$ 0,26 | 0,95 $\pm$ 0,63                   | 0,865        | 0,85 $\pm$ 0,26                   | 0,347            | 0,86 $\pm$ 0,19                   | 0,316            |  |
| Ribose                            | 1,00 $\pm$ 0,40 | 0,79 $\pm$ 0,49                   | 0,429        | 1,08 $\pm$ 0,46                   | 0,766            | 1,11 $\pm$ 0,30                   | 0,583            |  |
| Sedoheptulose (beta-2,7-anhydro-) | 1,00 $\pm$ 0,39 | 0,84 $\pm$ 0,53                   | 0,556        | 0,61 $\pm$ 0,23                   | 0,063            | 0,64 $\pm$ 0,17                   | 0,065            |  |
| Sucrose                           | 1,00 $\pm$ 0,23 | 1,00 $\pm$ 0,63                   | 0,997        | <b>0,17 <math>\pm</math> 0,05</b> | <b>0,000</b>     | <b>0,25 <math>\pm</math> 0,07</b> | <b>&lt;0,001</b> |  |
| Trehalose                         | 1,00 $\pm$ 0,39 | 1,37 $\pm$ 1,21                   | 0,489        | <b>0,36 <math>\pm</math> 0,15</b> | <b>0,004</b>     | <b>0,40 <math>\pm</math> 0,13</b> | <b>0,005</b>     |  |
| Xylose                            | 1,00 $\pm$ 0,22 | 0,75 $\pm$ 0,44                   | 0,243        | <b>0,34 <math>\pm</math> 0,12</b> | <b>0,000</b>     | <b>0,34 <math>\pm</math> 0,10</b> | <b>&lt;0,001</b> |  |
| <u>Phosphate esters</u>           |                 |                                   |              |                                   |                  |                                   |                  |  |
| Dihydroxyacetone phosphate        | 1,00 $\pm$ 0,10 | 0,98 $\pm$ 0,12                   | 0,782        | <b>0,42 <math>\pm</math> 0,05</b> | <b>&lt;0,001</b> | <b>0,42 <math>\pm</math> 0,08</b> | <b>&lt;0,001</b> |  |
| Fructose 6-phosphate              | 1,00 $\pm$ 0,11 | <b>1,22 <math>\pm</math> 0,08</b> | <b>0,003</b> | <b>0,79 <math>\pm</math> 0,15</b> | <b>0,017</b>     | <b>0,74 <math>\pm</math> 0,14</b> | <b>0,005</b>     |  |
| Fructose 1,6-bisphosphate         |                 |                                   |              | n.d.                              |                  |                                   |                  |  |
| Glucose 1-phosphate               | 1,00 $\pm$ 0,24 | <b>0,68 <math>\pm</math> 0,22</b> | <b>0,041</b> | <b>0,69 <math>\pm</math> 0,10</b> | <b>0,016</b>     | 0,80 $\pm$ 0,04                   | 0,079            |  |
| Glucose 6-phosphate               | 1,00 $\pm$ 0,09 | <b>1,13 <math>\pm</math> 0,04</b> | <b>0,007</b> | <b>0,64 <math>\pm</math> 0,06</b> | <b>&lt;0,001</b> | <b>0,65 <math>\pm</math> 0,07</b> | <b>&lt;0,001</b> |  |
| Glyceraldehyde 3-phosphate        | 1,00 $\pm$ 0,20 | <b>1,30 <math>\pm</math> 0,20</b> | <b>0,034</b> | 0,89 $\pm$ 0,37                   | 0,548            | <b>2,76 <math>\pm</math> 1,09</b> | <b>0,004</b>     |  |
| Glycerol 3-phosphate              | 1,00 $\pm$ 0,28 | <b>0,60 <math>\pm</math> 0,29</b> | <b>0,035</b> | 0,85 $\pm$ 0,31                   | 0,407            | <b>0,66 <math>\pm</math> 0,23</b> | <b>0,046</b>     |  |
| 3-Phosphoglycerate                | 1,00 $\pm$ 0,16 | <b>1,27 <math>\pm</math> 0,21</b> | <b>0,031</b> | <b>0,51 <math>\pm</math> 0,07</b> | <b>&lt;0,001</b> | <b>0,62 <math>\pm</math> 0,07</b> | <b>&lt;0,001</b> |  |
| <u>Organic acids</u>              |                 |                                   |              |                                   |                  |                                   |                  |  |
| Benzoate                          | 1,00 $\pm$ 0,29 | 0,98 $\pm$ 0,58                   | 0,955        | 0,93 $\pm$ 0,19                   | 0,640            | 0,84 $\pm$ 0,24                   | 0,334            |  |
| Butanoate (4-amino-)              | 1,00 $\pm$ 0,65 | 0,67 $\pm$ 0,64                   | 0,394        | 1,34 $\pm$ 0,74                   | 0,418            | <b>2,01 <math>\pm</math> 0,48</b> | <b>0,012</b>     |  |
| Fumarate                          | 1,00 $\pm$ 0,26 | 0,77 $\pm$ 0,44                   | 0,303        | <b>0,28 <math>\pm</math> 0,12</b> | <b>&lt;0,001</b> | <b>0,13 <math>\pm</math> 0,04</b> | <b>&lt;0,001</b> |  |
| Galactonate                       | 1,00 $\pm$ 0,22 | 0,88 $\pm$ 0,50                   | 0,616        | 0,86 $\pm$ 0,36                   | 0,427            | <b>0,70 <math>\pm</math> 0,20</b> | <b>0,034</b>     |  |
| Gluconate                         | 1,00 $\pm$ 1,41 | 0,07 $\pm$ 0,04                   | 0,137        | 0,10 $\pm$ 0,02                   | 0,191            | 0,06 $\pm$ 0,01                   | 0,306            |  |

|                       |             |             |       |                     |                  |                    |                  |
|-----------------------|-------------|-------------|-------|---------------------|------------------|--------------------|------------------|
| Glutarate (2-oxo-)    | 1,00 ± 0,32 | 1,16 ± 0,68 | 0,609 | 0,96 ± 0,21         | 0,817            | 0,94 ± 0,23        | 0,732            |
| Glycerate             | 1,00 ± 0,30 | 0,82 ± 0,46 | 0,447 | <b>0,50 ± 0,10</b>  | <b>0,003</b>     | <b>0,37 ± 0,11</b> | <b>&lt;0,001</b> |
| Gulonate              | 1,00 ± 0,92 | 0,91 ± 1,03 | 0,881 | <b>0,12 ± 0,02</b>  | <b>0,042</b>     | <b>0,09 ± 0,03</b> | <b>0,037</b>     |
| Hexadecanoate         | 1,00 ± 0,40 | 1,31 ± 1,17 | 0,548 | 1,07 ± 0,45         | 0,797            | 0,90 ± 0,25        | 0,631            |
| Malate                | 1,00 ± 0,32 | 0,87 ± 0,55 | 0,640 | <b>0,25 ± 0,12</b>  | <b>&lt;0,001</b> | <b>0,15 ± 0,04</b> | <b>&lt;0,001</b> |
| Maleate               | 1,00 ± 0,37 | 0,95 ± 0,55 | 0,853 | 0,83 ± 0,39         | 0,465            | <b>0,54 ± 0,21</b> | <b>0,025</b>     |
| Nicotinate            | 1,00 ± 0,31 | 0,87 ± 0,48 | 0,586 | 0,76 ± 0,23         | 0,150            | 0,94 ± 0,27        | 0,726            |
| Octadecanoate         | 1,00 ± 0,45 | 1,14 ± 1,09 | 0,773 | 1,05 ± 0,46         | 0,856            | 0,86 ± 0,25        | 0,522            |
| Pyruvate              | 1,00 ± 0,35 | 1,04 ± 0,69 | 0,910 | 1,08 ± 0,29         | 0,658            | 0,84 ± 0,24        | 0,376            |
| Quinate               | 1,00 ± 0,35 | 0,88 ± 0,55 | 0,750 | 1,18 ± 0,36         | 0,505            | 1,26 ± 0,37        | 0,350            |
| Shikimate             | 1,00 ± 0,27 | 1,02 ± 0,55 | 0,942 | 0,77 ± 0,25         | 0,155            | 0,84 ± 0,21        | 0,266            |
| Sinapate (cis-)       | 1,00 ± 0,40 | 0,78 ± 0,43 | 0,374 | 0,83 ± 0,34         | 0,449            | 0,71 ± 0,27        | 0,161            |
| Sinapate (trans-)     | 1,00 ± 0,40 | 0,73 ± 0,38 | 0,256 | 0,86 ± 0,33         | 0,528            | 0,69 ± 0,27        | 0,157            |
| Succinate             | 1,00 ± 0,36 | 1,39 ± 0,93 | 0,361 | <b>0,35 ± 0,13</b>  | <b>0,002</b>     | <b>0,30 ± 0,07</b> | <b>&lt;0,001</b> |
| Threonate             | 1,00 ± 0,20 | 0,77 ± 0,42 | 0,264 | <b>0,51 ± 0,18</b>  | <b>0,001</b>     | <b>0,35 ± 0,11</b> | <b>&lt;0,001</b> |
| <u>Amino acids</u>    |             |             |       |                     |                  |                    |                  |
| Alanine               | 1,00 ± 0,38 | 0,78 ± 0,50 | 0,409 | 1,09 ± 0,40         | 0,703            | <b>2,01 ± 0,35</b> | <b>&lt;0,001</b> |
| Arginine              |             |             |       | n.d.                |                  |                    |                  |
| Aspartate             | 1,00 ± 0,50 | 0,92 ± 0,60 | 0,803 | <b>3,61 ± 2,30</b>  | <b>0,022</b>     | <b>3,64 ± 0,99</b> | <b>&lt;0,001</b> |
| Glutamate             | 1,00 ± 0,96 | 0,77 ± 0,67 | 0,647 | 2,92 ± 2,03         | 0,063            | 2,03 ± 0,76        | 0,066            |
| Glycine               | 1,00 ± 1,22 | 0,46 ± 0,37 | 0,320 | 0,56 ± 0,22         | 0,404            | 0,70 ± 0,23        | 0,564            |
| Isoleucine            | 1,00 ± 1,17 | 0,54 ± 0,43 | 0,391 | 1,20 ± 0,37         | 0,692            | 0,83 ± 0,09        | 0,726            |
| Leucine               | 1,00 ± 1,08 | 0,60 ± 0,49 | 0,433 | 0,65 ± 0,26         | 0,464            | 0,70 ± 0,10        | 0,509            |
| Proline               | 1,00 ± 1,86 | 0,26 ± 0,32 | 0,356 | 0,28 ± 0,07         | 0,367            | 0,30 ± 0,05        | 0,379            |
| Pyroglutamate         | 1,00 ± 0,21 | 0,88 ± 0,40 | 0,538 | 1,05 ± 0,44         | 0,803            | 1,27 ± 0,30        | 0,093            |
| Serine                | 1,00 ± 0,46 | 1,01 ± 0,82 | 0,986 | 0,55 ± 0,18         | 0,050            | 1,16 ± 0,33        | 0,500            |
| Threonine             | 1,00 ± 0,41 | 0,78 ± 0,44 | 0,396 | <b>16,00 ± 6,45</b> | <b>&lt;0,001</b> | <b>8,56 ± 1,51</b> | <b>&lt;0,001</b> |
| Tryptophan            | 1,00 ± 0,21 | 0,88 ± 0,64 | 0,763 | 0,91 ± 0,25         | 0,622            | 1,04 ± 0,23        | 0,840            |
| Valine                | 1,00 ± 0,61 | 0,90 ± 0,53 | 0,768 | 0,93 ± 0,24         | 0,802            | 1,14 ± 0,25        | 0,604            |
| <u>Sugar alcohols</u> |             |             |       |                     |                  |                    |                  |
| Erythritol            | 1,00 ± 0,39 | 0,97 ± 0,54 | 0,922 | 0,88 ± 0,19         | 0,504            | 0,82 ± 0,24        | 0,355            |
| Glycerol              | 1,00 ± 0,26 | 0,88 ± 0,50 | 0,603 | <b>0,65 ± 0,17</b>  | <b>0,021</b>     | <b>0,65 ± 0,16</b> | <b>0,018</b>     |
| Inositol (myo-)       | 1,00 ± 0,34 | 1,09 ± 0,62 | 0,772 | <b>0,20 ± 0,05</b>  | <b>&lt;0,001</b> | <b>0,20 ± 0,05</b> | <b>&lt;0,001</b> |
| Maltitol              | 1,00 ± 0,87 | 0,85 ± 0,73 | 0,757 | <b>0,08 ± 0,03</b>  | <b>0,027</b>     | <b>0,06 ± 0,03</b> | <b>0,040</b>     |
| Mannitol              | 1,00 ± 0,73 | 0,67 ± 0,36 | 0,346 | 0,77 ± 0,44         | 0,524            | 1,21 ± 0,39        | 0,669            |

Others

|                        |             |             |       |                    |              |                    |                  |
|------------------------|-------------|-------------|-------|--------------------|--------------|--------------------|------------------|
| Ascorbate              | 1,00 ± 0,89 | 1,76 ± 1,12 | 0,220 | <b>3,14 ± 1,60</b> | <b>0,017</b> | <b>5,48 ± 1,66</b> | <b>&lt;0,001</b> |
| Dehydroascorbate dimer | 1,00 ± 0,58 | 1,28 ± 0,72 | 0,475 | 0,80 ± 0,25        | 0,451        | 0,89 ± 0,32        | 0,698            |
| Ethanolamine           | 1,00 ± 0,68 | 0,96 ± 1,13 | 0,941 | 1,11 ± 0,63        | 0,774        | <b>2,99 ± 1,54</b> | <b>0,016</b>     |
| Phosphate              | 1,00 ± 0,21 | 0,75 ± 0,40 | 0,198 | 0,90 ± 0,32        | 0,524        | 1,14 ± 0,29        | 0,349            |
| Spermidine             | 1,00 ± 0,36 | 0,74 ± 0,44 | 0,317 | 0,86 ± 0,30        | 0,496        | 0,69 ± 0,31        | 0,174            |
| Uracil                 | 1,00 ± 0,32 | 1,12 ± 0,84 | 0,745 | 1,16 ± 0,32        | 0,410        | 0,93 ± 0,25        | 0,681            |

n.d.: not detectable



**Supplementary Table S4.** Changes in Arabidopsis leaf metabolite levels after 8 h illumination (16 h light/8 h dark) in *cyfbp*, *cfbp1*, and *cyfbp cfbp1* knockout lines compared relative to the wild type. Metabolite profiling was performed using GC-TOF-MS analysis and fluorescence spectroscopy. Results are means  $\pm$  SD ( $n = 6$ ). Values that are significantly different from the wild type according to Student's *t*-test are indicated in bold ( $P$  value  $\leq 0.05$ ).

| Metabolites                       | WT              | <i>cyfbp</i>                      | p-value          | Light                               |                  | <i>cyfbp x cfbp1</i>               | p-value          |  |
|-----------------------------------|-----------------|-----------------------------------|------------------|-------------------------------------|------------------|------------------------------------|------------------|--|
|                                   |                 |                                   |                  | <i>cfbp1</i>                        | p-value          |                                    |                  |  |
| <u>Sugars</u>                     |                 |                                   |                  |                                     |                  |                                    |                  |  |
| Arabinose                         | 1,00 $\pm$ 0,43 | 1,48 $\pm$ 1,17                   | 0,369            | <b>0,58 <math>\pm</math> 0,10</b>   | <b>0,042</b>     | <b>0,56 <math>\pm</math> 0,20</b>  | <b>0,047</b>     |  |
| Fructose                          | 1,00 $\pm$ 0,83 | 1,54 $\pm$ 1,50                   | 0,458            | <b>0,13 <math>\pm</math> 0,03</b>   | <b>0,028</b>     | <b>0,10 <math>\pm</math> 0,06</b>  | <b>0,024</b>     |  |
| Fucose                            | 1,00 $\pm$ 0,40 | 1,45 $\pm$ 1,15                   | 0,381            | <b>0,50 <math>\pm</math> 0,11</b>   | <b>0,015</b>     | <b>0,40 <math>\pm</math> 0,15</b>  | <b>0,006</b>     |  |
| Galactose                         | 1,00 $\pm$ 0,57 | 2,71 $\pm$ 2,15                   | 0,090            | 0,48 $\pm$ 0,19                     | 0,059            | 0,52 $\pm$ 0,21                    | 0,080            |  |
| Glucose                           | 1,00 $\pm$ 0,68 | 1,74 $\pm$ 1,72                   | 0,348            | <b>0,11 <math>\pm</math> 0,04</b>   | <b>0,010</b>     | <b>0,07 <math>\pm</math> 0,04</b>  | <b>0,008</b>     |  |
| Isomaltose                        | 1,00 $\pm$ 0,53 | <b>4,51 <math>\pm</math> 3,54</b> | <b>0,037</b>     | 0,47 $\pm$ 0,10                     | 0,090            | <b>0,29 <math>\pm</math> 0,09</b>  | <b>0,033</b>     |  |
| Maltose                           | 1,00 $\pm$ 0,42 | 3,93 $\pm$ 4,27                   | 0,126            | <b>0,22 <math>\pm</math> 0,08</b>   | <b>0,018</b>     | <b>0,21 <math>\pm</math> 0,07</b>  | <b>0,001</b>     |  |
| Mannose                           | 1,00 $\pm$ 0,59 | 1,63 $\pm$ 1,30                   | 0,307            | <b>0,27 <math>\pm</math> 0,08</b>   | <b>0,013</b>     | <b>0,25 <math>\pm</math> 0,10</b>  | <b>0,011</b>     |  |
| Psicose                           | 1,00 $\pm$ 0,36 | 2,33 $\pm$ 1,82                   | 0,110            | <b>0,28 <math>\pm</math> 0,10</b>   | <b>&lt;0,001</b> | <b>0,34 <math>\pm</math> 0,11</b>  | <b>0,002</b>     |  |
| Rhamnose                          | 1,00 $\pm$ 0,43 | 1,66 $\pm$ 1,35                   | 0,277            | 0,79 $\pm$ 0,16                     | 0,277            | 0,67 $\pm$ 0,21                    | 0,118            |  |
| Ribose                            | 1,00 $\pm$ 0,36 | 1,77 $\pm$ 1,51                   | 0,256            | 1,18 $\pm$ 0,34                     | 0,390            | 1,22 $\pm$ 0,44                    | 0,370            |  |
| Sedoheptulose (beta-2,7-anhydro-) | 1,00 $\pm$ 0,43 | 1,31 $\pm$ 1,04                   | 0,512            | <b>0,47 <math>\pm</math> 0,10</b>   | <b>0,014</b>     | <b>0,36 <math>\pm</math> 0,13</b>  | <b>0,005</b>     |  |
| Sucrose                           | 1,00 $\pm$ 0,43 | 2,21 $\pm$ 2,01                   | 0,179            | <b>0,55 <math>\pm</math> 0,13</b>   | <b>0,034</b>     | <b>0,27 <math>\pm</math> 0,07</b>  | <b>0,002</b>     |  |
| Trehalose                         | 1,00 $\pm$ 0,44 | 2,37 $\pm$ 2,31                   | 0,182            | <b>0,31 <math>\pm</math> 0,11</b>   | <b>0,004</b>     | <b>0,31 <math>\pm</math> 0,17</b>  | <b>0,005</b>     |  |
| Xylose                            | 1,00 $\pm$ 0,48 | 1,40 $\pm$ 1,05                   | 0,421            | <b>0,35 <math>\pm</math> 0,08</b>   | <b>0,009</b>     | <b>0,30 <math>\pm</math> 0,10</b>  | <b>0,006</b>     |  |
| <u>Phosphate ester</u>            |                 |                                   |                  |                                     |                  |                                    |                  |  |
| Dihydroxyacetone phosphate        | 1,00 $\pm$ 0,05 | <b>1,26 <math>\pm</math> 0,14</b> | <b>0,002</b>     | <b>1,65 <math>\pm</math> 0,55</b>   | <b>0,017</b>     | <b>3,08 <math>\pm</math> 0,29</b>  | <b>&lt;0,001</b> |  |
| Fructose 6-phosphate              | 1,00 $\pm$ 0,08 | <b>1,23 <math>\pm</math> 0,13</b> | <b>0,004</b>     | 0,97 $\pm$ 0,11                     | 0,631            | 0,99 $\pm$ 0,10                    | 0,887            |  |
| Fructose 1,6-bisphosphate         | 1,00 $\pm$ 0,38 | <b>4,61 <math>\pm</math> 2,00</b> | <b>0,002</b>     | <b>16,54 <math>\pm</math> 11,60</b> | <b>0,009</b>     | <b>59,76 <math>\pm</math> 7,22</b> | <b>&lt;0,001</b> |  |
| Glucose 1-phosphate               | 1,00 $\pm$ 0,27 | 1,06 $\pm$ 0,43                   | 0,776            | 1,05 $\pm$ 0,21                     | 0,741            | 0,74 $\pm$ 0,16                    | 0,065            |  |
| Glucose 6-phosphate               | 1,00 $\pm$ 0,06 | <b>1,25 <math>\pm</math> 0,06</b> | <b>&lt;0,001</b> | 0,95 $\pm$ 0,05                     | 0,108            | <b>0,91 <math>\pm</math> 0,06</b>  | <b>0,033</b>     |  |
| Glyceraldehyde 3-phosphate        | 1,00 $\pm$ 0,33 | <b>4,83 <math>\pm</math> 1,13</b> | <b>&lt;0,001</b> | <b>12,54 <math>\pm</math> 5,20</b>  | <b>&lt;0,001</b> | <b>29,77 <math>\pm</math> 3,92</b> | <b>&lt;0,001</b> |  |
| Glycerol 3-phosphate              | 1,00 $\pm$ 0,42 | 0,74 $\pm$ 0,50                   | 0,359            | 0,63 $\pm$ 0,30                     | 0,111            | <b>0,45 <math>\pm</math> 0,20</b>  | <b>0,017</b>     |  |
| 3-Phosphoglycerate                | 1,00 $\pm$ 0,09 | <b>2,88 <math>\pm</math> 0,24</b> | <b>&lt;0,001</b> | <b>1,85 <math>\pm</math> 0,54</b>   | <b>0,004</b>     | <b>2,27 <math>\pm</math> 0,15</b>  | <b>&lt;0,001</b> |  |
| <u>Organic acids</u>              |                 |                                   |                  |                                     |                  |                                    |                  |  |
| Benzoate                          | 1,00 $\pm$ 0,37 | 1,47 $\pm$ 1,26                   | 0,399            | <b>0,60 <math>\pm</math> 0,18</b>   | <b>0,039</b>     | <b>0,57 <math>\pm</math> 0,22</b>  | <b>0,036</b>     |  |
| Butanoate (4-amino-)              | 1,00 $\pm$ 0,57 | 1,17 $\pm$ 1,20                   | 0,760            | <b>2,86 <math>\pm</math> 1,65</b>   | <b>0,026</b>     | 2,27 $\pm$ 1,63                    | 0,102            |  |
| Fumarate                          | 1,00 $\pm$ 0,40 | 1,18 $\pm$ 0,95                   | 0,678            | <b>0,29 <math>\pm</math> 0,09</b>   | <b>0,002</b>     | <b>0,14 <math>\pm</math> 0,05</b>  | <b>&lt;0,001</b> |  |
| Galactonate                       | 1,00 $\pm$ 0,44 | 1,23 $\pm$ 0,91                   | 0,599            | <b>0,49 <math>\pm</math> 0,18</b>   | <b>0,026</b>     | <b>0,37 <math>\pm</math> 0,12</b>  | <b>0,007</b>     |  |
| Gluconate                         | 1,00 $\pm$ 0,29 | <b>2,01 <math>\pm</math> 1,04</b> | <b>0,044</b>     | <b>0,29 <math>\pm</math> 0,10</b>   | <b>0,002</b>     | <b>0,28 <math>\pm</math> 0,14</b>  | <b>&lt;0,001</b> |  |

|                       |             |                    |              |                    |                  |                    |                  |
|-----------------------|-------------|--------------------|--------------|--------------------|------------------|--------------------|------------------|
| Glutarate (2-oxo-)    | 1,00 ± 0,48 | 1,71 ± 1,64        | 0,334        | 0,65 ± 0,31        | 0,158            | <b>0,51 ± 0,24</b> | <b>0,049</b>     |
| Glycerate             | 1,00 ± 0,40 | 1,80 ± 1,17        | 0,146        | <b>0,24 ± 0,04</b> | <b>&lt;0,001</b> | <b>0,26 ± 0,10</b> | <b>0,001</b>     |
| Gulonate              | 1,00 ± 0,37 | <b>2,87 ± 1,17</b> | <b>0,004</b> | <b>0,06 ± 0,02</b> | <b>&lt;0,001</b> | <b>0,04 ± 0,02</b> | <b>&lt;0,001</b> |
| Hexadecanoate         | 1,00 ± 0,46 | 3,24 ± 4,00        | 0,204        | 0,76 ± 0,42        | 0,361            | 0,58 ± 0,39        | 0,117            |
| Malate                | 1,00 ± 0,47 | 0,71 ± 0,46        | 0,302        | <b>0,29 ± 0,15</b> | <b>0,005</b>     | <b>0,14 ± 0,10</b> | <b>0,001</b>     |
| Maleate               | 1,00 ± 0,31 | 0,91 ± 0,53        | 0,729        | <b>0,49 ± 0,25</b> | <b>0,010</b>     | <b>0,29 ± 0,11</b> | <b>&lt;0,001</b> |
| Nicotinate            | 1,00 ± 0,34 | 1,04 ± 0,68        | 0,906        | <b>0,49 ± 0,15</b> | <b>0,007</b>     | <b>0,58 ± 0,20</b> | <b>0,026</b>     |
| Octadecanoate         | 1,00 ± 0,48 | 3,24 ± 4,19        | 0,222        | 0,80 ± 0,50        | 0,487            | 0,56 ± 0,39        | 0,111            |
| Pyruvate              | 1,00 ± 0,37 | 1,36 ± 1,06        | 0,453        | 0,69 ± 0,26        | 0,124            | 0,60 ± 0,27        | 0,061            |
| Quinate               | 1,00 ± 0,59 | 1,47 ± 1,25        | 0,421        | 0,91 ± 0,44        | 0,759            | 1,08 ± 1,10        | 0,884            |
| Shikimate             | 1,00 ± 0,39 | 1,40 ± 1,00        | 0,378        | <b>0,62 ± 0,12</b> | <b>0,044</b>     | <b>0,49 ± 0,16</b> | <b>0,014</b>     |
| Sinapate (cis-)       | 1,00 ± 0,31 | 1,09 ± 0,65        | 0,760        | <b>0,52 ± 0,10</b> | <b>0,005</b>     | <b>0,37 ± 0,13</b> | <b>&lt;0,001</b> |
| Sinapate (trans-)     | 1,00 ± 0,40 | 1,02 ± 0,74        | 0,953        | <b>0,53 ± 0,20</b> | <b>0,028</b>     | <b>0,39 ± 0,13</b> | <b>0,006</b>     |
| Succinate             | 1,00 ± 0,35 | 1,56 ± 0,75        | 0,127        | <b>0,18 ± 0,05</b> | <b>&lt;0,001</b> | <b>0,11 ± 0,04</b> | <b>&lt;0,001</b> |
| Threonate             | 1,00 ± 0,44 | 1,11 ± 0,80        | 0,776        | <b>0,30 ± 0,09</b> | <b>0,003</b>     | <b>0,22 ± 0,08</b> | <b>0,002</b>     |
| <u>Amino acids</u>    |             |                    |              |                    |                  |                    |                  |
| Alanine               | 1,00 ± 0,43 | 1,43 ± 1,27        | 0,453        | 1,16 ± 0,43        | 0,525            | 1,22 ± 0,53        | 0,445            |
| Arginine              | 1,00 ± 0,48 | n.d.               |              | 0,76 ± 0,08        | 0,243            | 0,83 ± 0,59        | 0,651            |
| Aspartate             | 1,00 ± 1,10 | 0,61 ± 0,58        | 0,466        | 0,78 ± 0,35        | 0,645            | 0,63 ± 0,41        | 0,462            |
| Glutamate             | 1,00 ± 0,84 | 4,16 ± 4,49        | 0,122        | 2,38 ± 2,55        | 0,236            | 1,20 ± 0,94        | 0,699            |
| Glycine               | 1,00 ± 0,23 | 1,10 ± 0,97        | 0,829        | <b>3,25 ± 2,01</b> | <b>0,036</b>     | 1,81 ± 1,23        | 0,184            |
| Isoleucine            | 1,00 ± 0,26 | 1,67 ± 1,67        | 0,357        | 1,21 ± 0,14        | 0,110            | 1,03 ± 0,29        | 0,874            |
| Leucine               | 1,00 ± 0,31 | 1,80 ± 1,75        | 0,295        | <b>0,59 ± 0,12</b> | <b>0,012</b>     | <b>0,57 ± 0,22</b> | <b>0,019</b>     |
| Proline               | 1,00 ± 0,36 | 2,27 ± 3,03        | 0,332        | <b>1,50 ± 0,29</b> | <b>0,026</b>     | 1,79 ± 1,17        | 0,148            |
| Pyroglutamate         | 1,00 ± 0,37 | 1,00 ± 0,64        | 0,993        | 0,81 ± 0,28        | 0,332            | 0,61 ± 0,22        | 0,052            |
| Serine                | 1,00 ± 0,43 | 0,88 ± 0,37        | 0,631        | <b>0,50 ± 0,18</b> | <b>0,024</b>     | <b>0,40 ± 0,09</b> | <b>0,008</b>     |
| Threonine             | 1,00 ± 0,42 | 0,75 ± 0,34        | 0,271        | <b>8,50 ± 2,06</b> | <b>&lt;0,001</b> | <b>4,74 ± 1,43</b> | <b>&lt;0,001</b> |
| Tryptophan            | 1,00 ± 0,55 | 1,98 ± 1,86        | 0,247        | 0,72 ± 0,28        | 0,292            | 0,57 ± 0,36        | 0,166            |
| Valine                | 1,00 ± 0,38 | 1,59 ± 1,48        | 0,363        | <b>0,50 ± 0,12</b> | <b>0,012</b>     | 0,68 ± 0,20        | 0,104            |
| <u>Sugar alcohols</u> |             |                    |              |                    |                  |                    |                  |
| Erythritol            | 1,00 ± 0,42 | 1,16 ± 0,97        | 0,713        | <b>0,54 ± 0,21</b> | <b>0,037</b>     | <b>0,49 ± 0,24</b> | <b>0,041</b>     |
| Glycerol              | 1,00 ± 0,39 | 1,72 ± 1,41        | 0,256        | <b>0,48 ± 0,11</b> | <b>0,010</b>     | <b>0,50 ± 0,25</b> | <b>0,022</b>     |
| Inositol (myo-)       | 1,00 ± 0,47 | 1,57 ± 1,34        | 0,348        | <b>0,13 ± 0,05</b> | <b>0,001</b>     | <b>0,14 ± 0,05</b> | <b>0,001</b>     |
| Maltitol              | 1,00 ± 0,47 | 5,00 ± 4,43        | 0,052        | <b>0,06 ± 0,03</b> | <b>&lt;0,001</b> | <b>0,03 ± 0,02</b> | <b>&lt;0,001</b> |
| Mannitol              | 1,00 ± 0,92 | 1,19 ± 1,12        | 0,772        | 0,64 ± 0,28        | 0,423            | 0,51 ± 0,25        | 0,281            |
| <u>Others</u>         |             |                    |              |                    |                  |                    |                  |

|                        |             |             |       |                    |              |                    |              |
|------------------------|-------------|-------------|-------|--------------------|--------------|--------------------|--------------|
| Ascorbate              | 1,00 ± 0,70 | 0,70 ± 0,52 | 0,422 | 1,15 ± 0,60        | 0,693        | 1,29 ± 0,80        | 0,525        |
| Dehydroascorbate dimer | 1,00 ± 0,56 | 3,71 ± 3,43 | 0,086 | 0,60 ± 0,24        | 0,136        | 0,48 ± 0,18        | 0,054        |
| Ethanolamine           | 1,00 ± 0,68 | 0,96 ± 1,19 | 0,950 | 1,90 ± 1,47        | 0,205        | <b>4,38 ± 2,63</b> | <b>0,012</b> |
| Phosphate              | 1,00 ± 0,45 | 1,41 ± 1,12 | 0,424 | 0,67 ± 0,29        | 0,162        | 0,61 ± 0,35        | 0,125        |
| Spermidine             | 1,00 ± 0,42 | 1,10 ± 0,80 | 0,784 | <b>0,55 ± 0,22</b> | <b>0,044</b> | <b>0,42 ± 0,19</b> | <b>0,012</b> |
| Uracil                 | 1,00 ± 0,46 | 1,16 ± 0,85 | 0,702 | 0,66 ± 0,26        | 0,150        | 0,64 ± 0,31        | 0,139        |

n.d.: not detectable
